# Supplementary material
Source: Royal Society of Chemistry journal article supplement (doi:10.1039/d5cp04716a)
Supplement: d5cp04716a1.pdf [file d5cp04716a1.pdf]

### Supplementary data

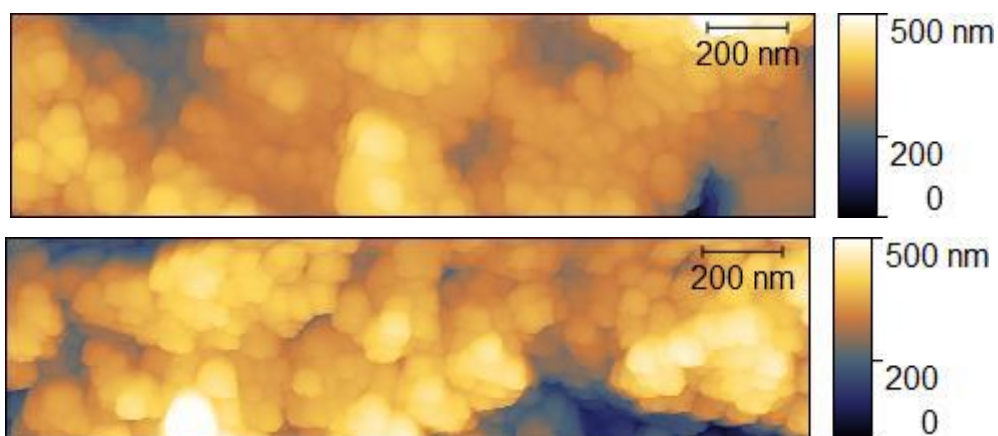

Figure S1- 2D AFM images of photoabsorbers: BTCF:Dy (a) and P25/BTCF:Dy (b).

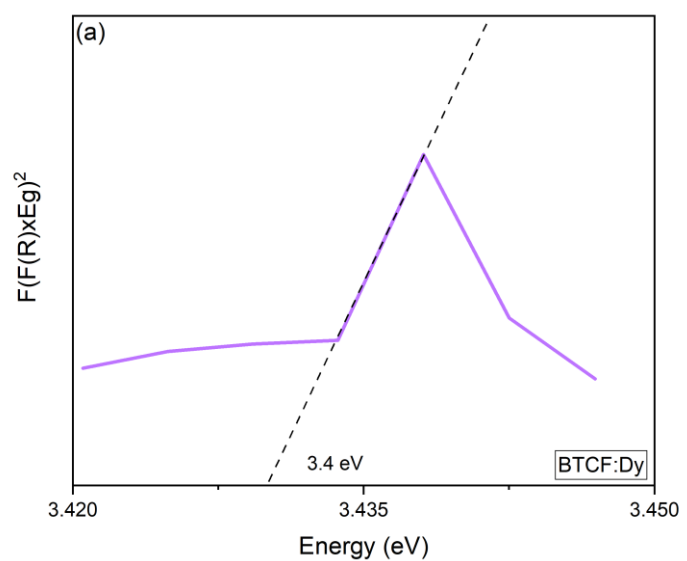

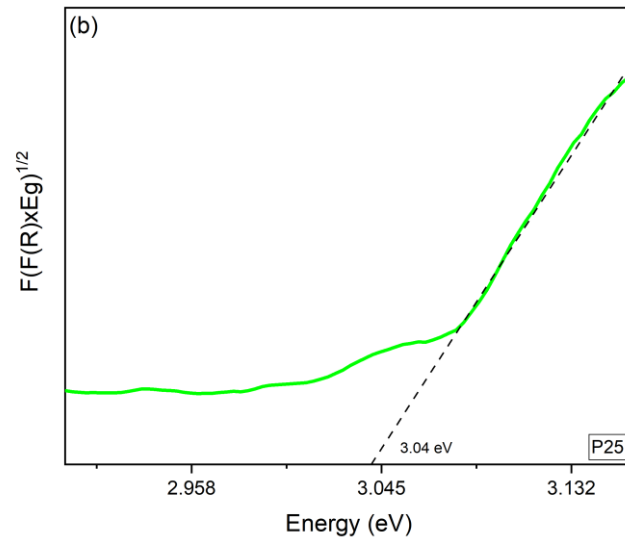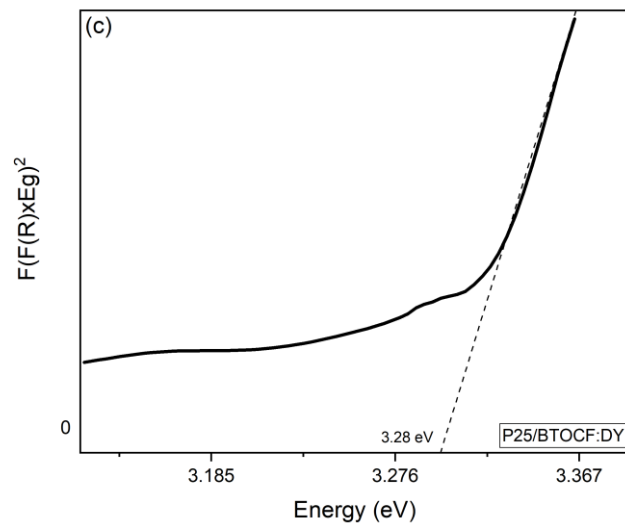

Figure S2- Band gap images of photoabsorbers: BTOCF:Dy (a), P25 (b) and P25/BTOCF:Dy (c).
